# Supplementary material for: Gut microbes predominantly act as living beneficial partners rather than raw nutrients
Source: PubMed Central journal article supplement (PMC10366161; doi:10.1038/s41598-023-38669-7), 2023-07-24

**Supplementary Figure 3.** (A) Growth trend of the four *L. plantarum* strains monitored over the course of a standard mono-association on LPD. (B) CFUs of the 4 *L. plantarum* strains monitored at day 7 after mono-association on LPD in standard conditions (-Ery), on LPD supplemented with 20  $\mu\text{g/ml}$  of erythromycin with daily addition of live bacterial cells (+ Ery [daily addition]) and on LPD supplemented with 20  $\mu\text{g/ml}$  of erythromycin without daily addition of live bacterial cells (+ Ery [no addition]). Asterisks illustrate statistically significant difference on pairwise intra-strain comparisons between standard mono-association (-Ery) and the respective treatments (\*\*\*:  $p < 0,0001$ , ns: not significant). Center values in the graph represent means.

**A**

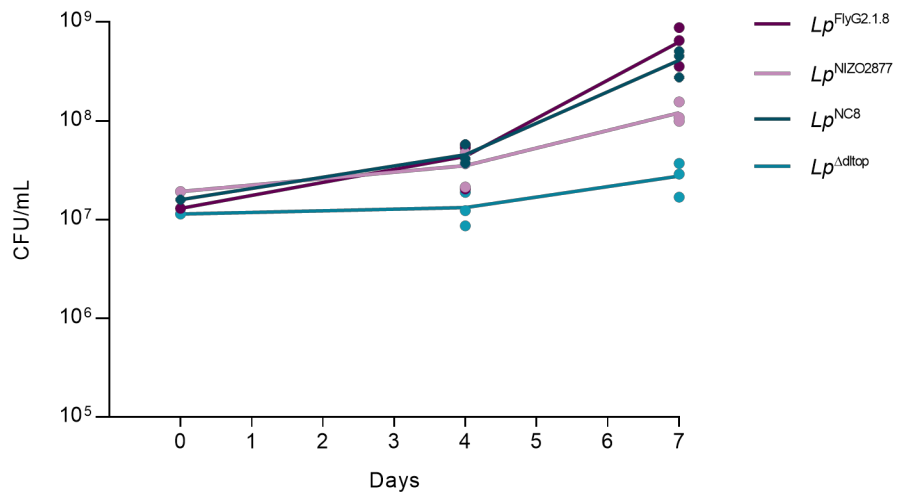

**B**

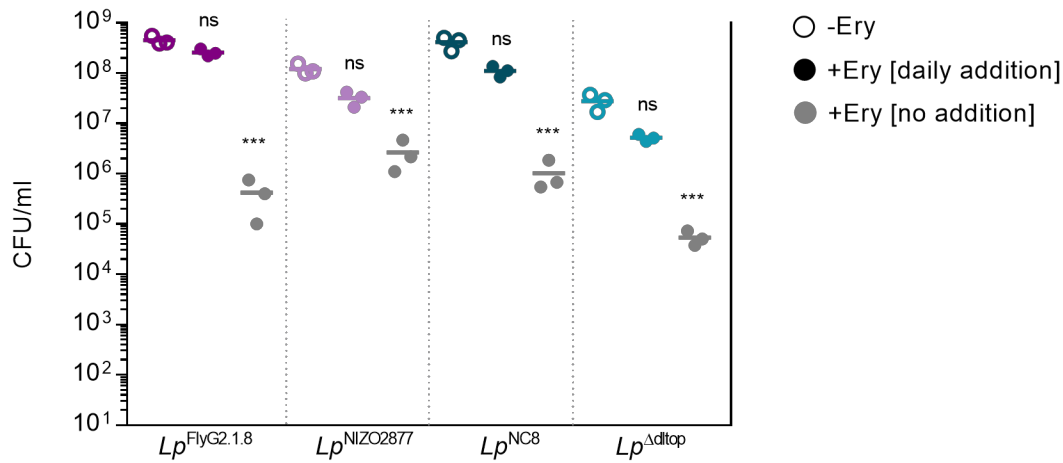

Supplement: 41598_2023_38669_MOESM3_ESM.pdf [file 41598_2023_38669_MOESM3_ESM.pdf]
