# Supplementary material for: Gut microbes predominantly act as living beneficial partners rather than raw nutrients
Source: PubMed Central journal article supplement (PMC10366161; doi:10.1038/s41598-023-38669-7), 2023-07-24

**Supplementary Figure 5.** Variable importance obtained through random forest analysis for each bacterial feature in promoting larval growth at day 7 after *L. plantarum*<sup>FlyG2.1.8</sup> (A), *L. plantarum*<sup>NIZO2877</sup> (B), *L. plantarum*<sup>NC8</sup> (C) and *L. plantarum*<sup>Δltop</sup> (D) association.

**A**

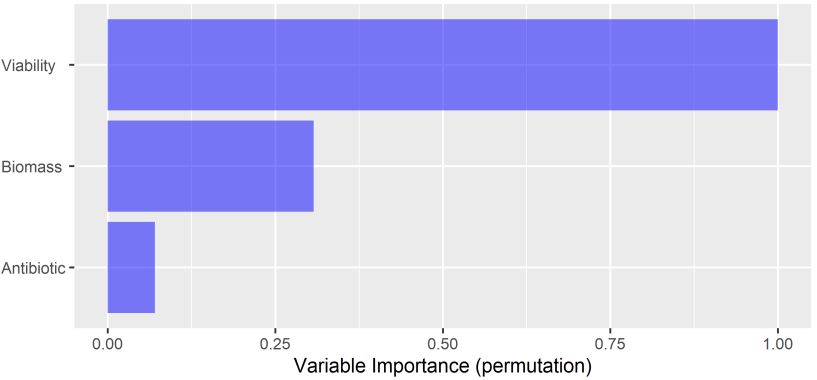

**B**

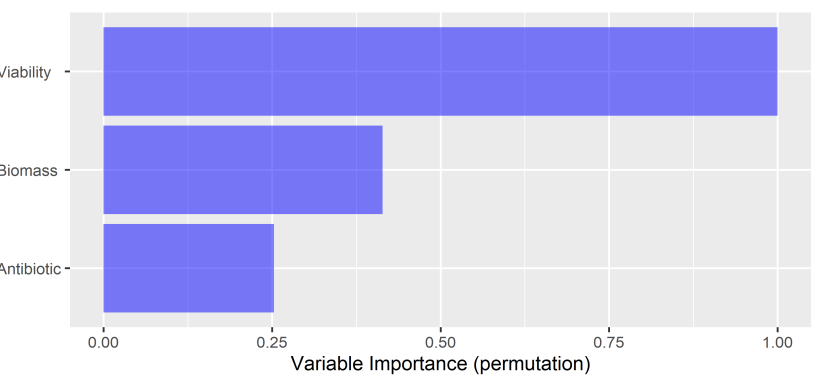

**C**

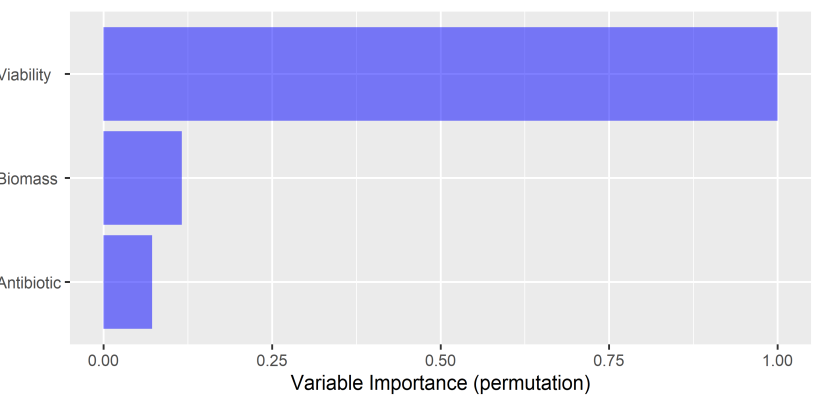

**D**

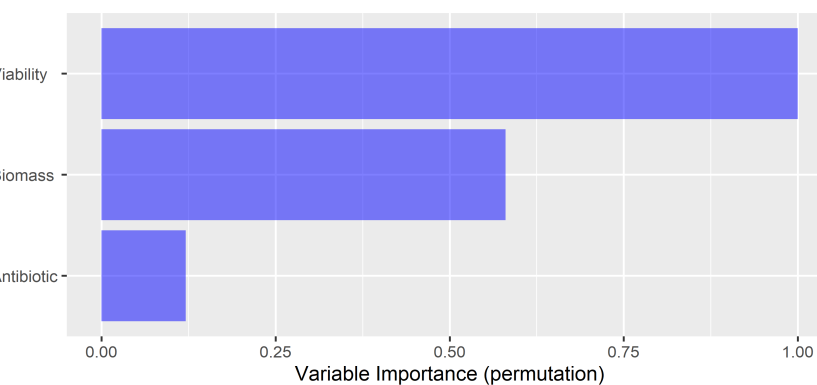

Supplement: 41598_2023_38669_MOESM5_ESM.pdf [file 41598_2023_38669_MOESM5_ESM.pdf]
